# Supplementary material for: High performance nanoporous silicon photoelectrodes co-catalyzed with an earth abundant [Mo3S13]2− nanocluster via drop coating
Source: Royal Society of Chemistry journal article supplement (doi:10.1039/c6ra01109h), 2016-01-01
Supplement: c6ra01109h1.pdf [file c6ra01109h1.pdf]

# High Performance Nanoporous Silicon Photoelectrodes co-catalyzed with Earth Abundant $[\text{Mo}_3\text{S}_{13}]^{2-}$ Nanocluster via Drop Coating

Miao Kan,<sup>a</sup> Jinping Jia<sup>a</sup> and Yixin Zhao<sup>a</sup>

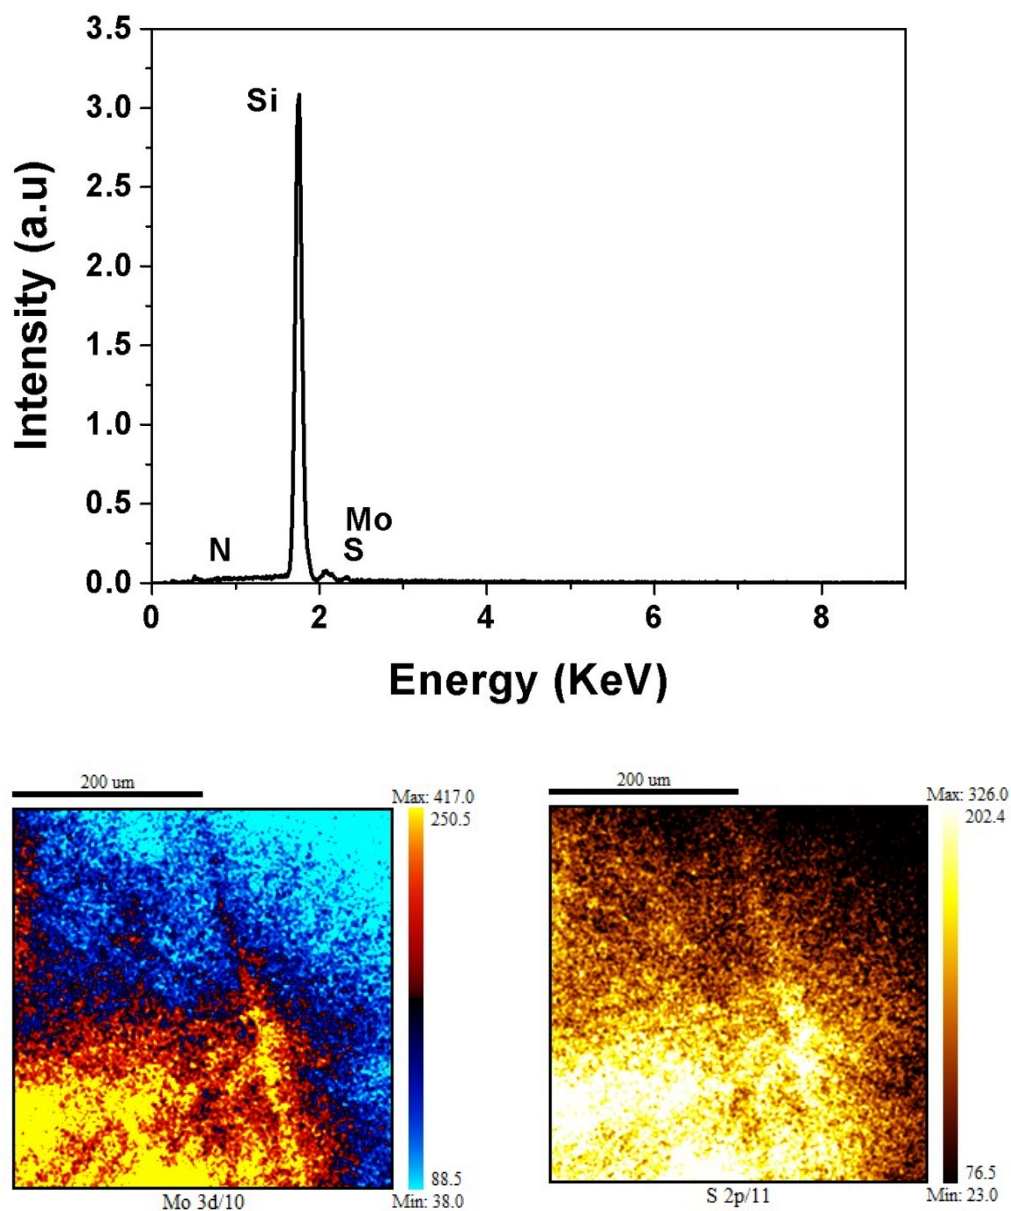

Figure S1 XRD pattern and XPS spectra of  $[\text{Mo}_3\text{S}_{13}]^{2-}/\text{b-Si}$ .

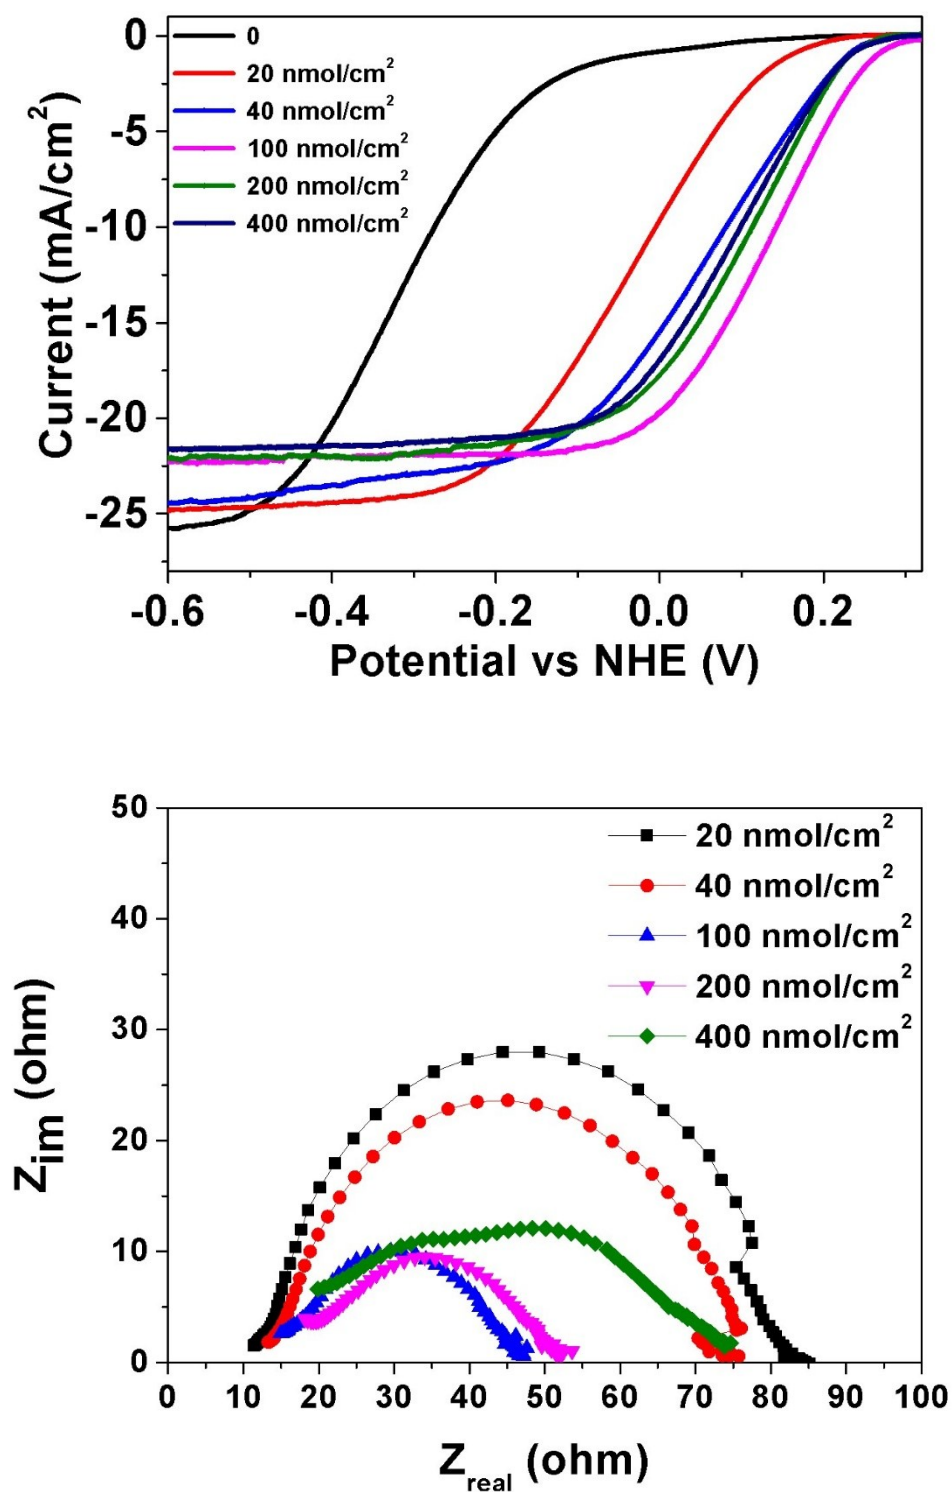

Figure S2. The J-V curves and EIS curves at -0.1V vs RHE of the b-Si deposited with different amount of [Mo<sub>3</sub>S<sub>13</sub>]<sup>2-</sup> nanoclusters.

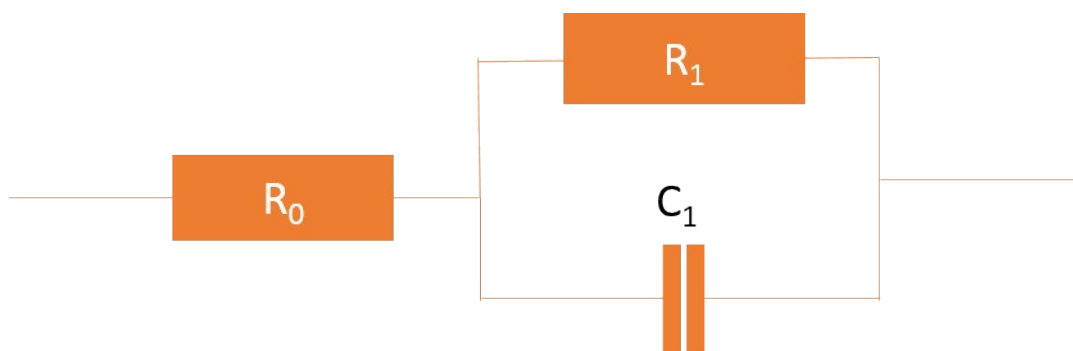

Figure S3. Equivalent model for EIS analysis for pl-Si, b-Si and  $[\text{Mo}_3\text{S}_{13}]^{2-}/\text{b-Si}$

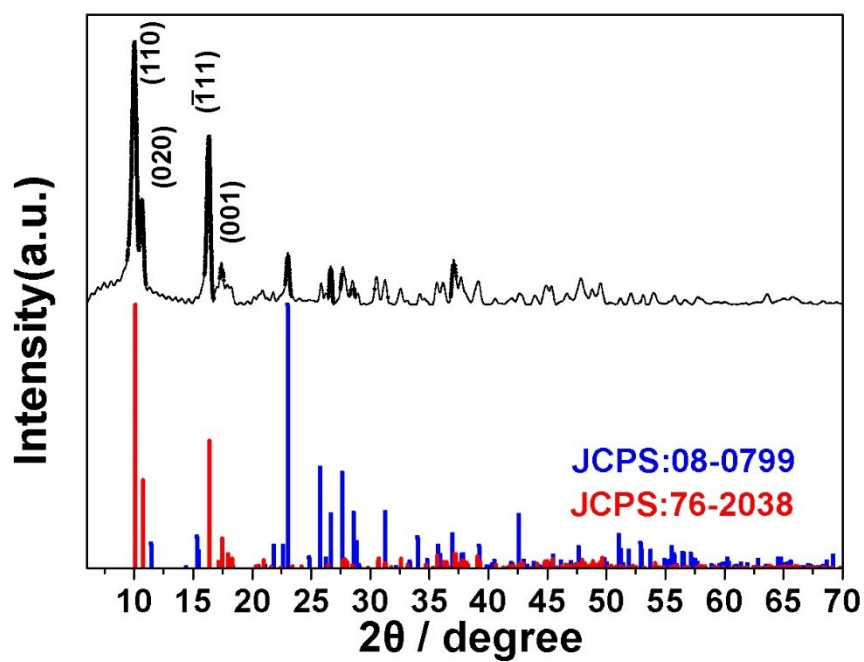

Figure S4. PDF cards of as synthesized molecule, sulfur and  $[\text{Mo}_3\text{S}_{13}]^{2-}$

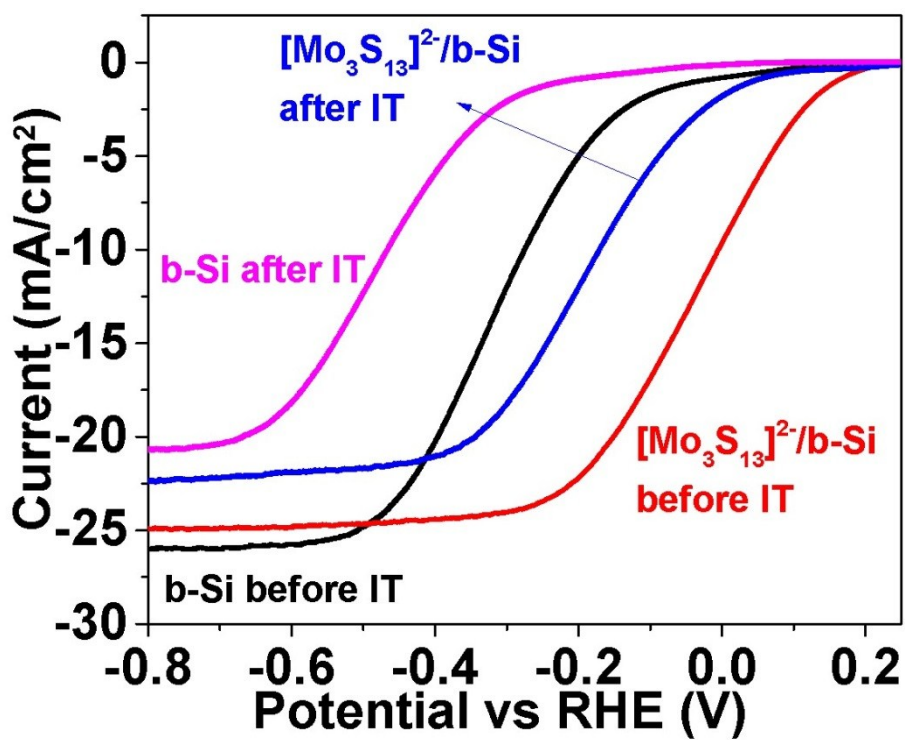

Figure S5. J-V curves for  $[\text{Mo}_3\text{S}_{13}]^{2-}/\text{b-Si}$  before and after 20000s test
